# Supplementary material for: Anterior optic pathway pathology in CNS demyelinating diseases
Source: PubMed Central journal article supplement — Brain. 2022 Feb 3;145(12):4308–19. doi: 10.1093/brain/awac030 (PMC9762948; doi:10.1093/brain/awac030), 2022-02-03
Supplement: awac030_supplementary_data.pdf [file awac030_supplementary_data.pdf]

**S1. List of the primary antibodies used and their optimised immunohistochemistry protocol.**

| <b>Target</b> | <b>Primary Antibody</b> | <b>Antibody dilution</b> | <b>Clone</b> | <b>Antigen Retrieval</b>                                | <b>Incubation Settings</b> |
|---------------|-------------------------|--------------------------|--------------|---------------------------------------------------------|----------------------------|
| PLP           | Biorad #MCA839G         | 1 : 1000                 | monoclonal   | Citrate pH6 microwave                                   | 1h RT                      |
| CD68          | Dako #M0874             | 1 : 50                   | monoclonal   | Citrate pH6 Autoclave                                   | 1h RT                      |
| CD3           | Dako #A0452             | 1 : 100                  | polyclonal   | Tris-EDTA pH 9 Autoclave                                | 1h RT                      |
| CD20          | Dako #IS604             | Ready to use             | monoclonal   | Citrate pH6 microwave                                   | 1h RT                      |
| C9neo         | Hycult Biotech #HM2264  | 1:100                    | monoclonal   | Tris-EDTA pH 9 Autoclave                                | 1h RT                      |
| $\beta$ APP   | Millipore#MAB348        | 1:5000                   | monoclonal   | Citrate pH6 Autoclave followed by 5 minutes Formic acid | 1h RT                      |
| GFAP          | Dako #Z0334             | 1 : 4000                 | polyclonal   | Citrate pH6 microwave                                   | 1h RT                      |
| AQP4          | Millipore #AB3594       | 1 : 750                  | polyclonal   | Citrate pH6 autoclave                                   | 1h RT                      |

## **S2. Characteristics of the inflammatory infiltrate in the anterior optic pathway demyelinating lesions.**

### **Multiple sclerosis**

In the multiple sclerosis cohort, the majority of multiple sclerosis cases showed evidence of inflammatory activity (i.e. active and mixed active/inactive) as it was found in 34 (73.9%) samples from 24 cases (75%). In particular, 4 donors presented acute active plaques (16.7% of donors - 6 samples), 8 had mixed active-inactive lesions (33.3% of donors - 9 samples), 6 presented both chronic inactive and mixed active-inactive lesions (25% of donors - 19 samples). The remaining 6 donors had chronic inactive plaques only (25% of donors - 12 samples).

The inflammatory features of the lesion types we identified in the anterior optic pathway resemble those usually observed in the rest of the CNS. Chronic inactive plaques displayed a mild and diffuse inflammatory activity. Some CD68+ microglia and CD3+ lymphocytes widespread throughout the plaque area, the lesion border and the surrounding myelinated white matter, without significant differences between these areas. The number of inflammatory cells detected in each area was slightly higher than observed in non-neurological controls ( $p < 0.05$  considering the semi quantitative scores of CD68+ and CD3+ elements in the parenchyma and in the perivascular area of plaque and peri-plaque;  $p < 0.05$  for CD68+ elements in the parenchyma and in the perivascular area of surrounding non-lesional white matter; see table and figure below) and, as expected, much lower than observed in active or mixed active-inactive MS lesions.

Mixed active-inactive plaques presented a typical border active pattern with a relatively inactive lesion core. The classic feature of a rim of microglia CD68+ at the edge of the plaque was not clearly visible in our samples, as found in other areas of the CNS. This was possibly due to the denser packaging of nerve bundles in the anterior optic pathway preventing the organization of the inflammatory border. Nevertheless, the border area had more inflammatory activity compared with both the plaque area ( $p \leq 0.05$  considering CD68+ pixel count and the semiquantitative scores of CD68+ and CD3+ elements in the parenchyma and in the perivascular area) and the surrounding non-lesional white matter ( $p \leq 0.05$  considering the semi quantitative scores of CD68+ elements in the parenchyma and in the perivascular area). Even in the inactive lesion core, inflammatory elements were more frequent than in control donors ( $p < 0.05$  considering CD68+ pixel count and the semiquantitative scores of CD68+ and CD3+ elements in the parenchyma and in the perivascular area) or in chronic inactive MS plaques ( $p < 0.05$  considering CD68+ pixel count and the

semiquantitative scores of parenchymal and vascular CD68+ elements, while CD3+ cells did not significantly differ). Therefore, inflammatory activity in mixed active-inactive plaques was predominant but not exclusively found at the plaque edge (see table and figure below).

Finally, acute active lesions were more densely inflamed than inactive or mixed active-inactive lesions ( $p < 0.005$  considering CD68+ pixel count and the semiquantitative scores of CD68+ and CD3+ elements in the parenchyma and in the perivascular area), and display a diffuse and homogeneous infiltration, without significant differences between the plaque area, the lesion border and the adjacent myelinated area - except for a lower inflammatory activity in the surrounding non-lesional white matter compared with the border of the lesions when considering parenchymal CD68+ and CD3+ elements ( $p = 0.008$  and  $p < 0.001$ , respectively). In acute active lesions, sparse CD68+ elements presented either microglial or macrophagic phenotype, the latter sometimes had PLP positive debris within the cytoplasm (see table and figure below).

### **Neuromyelitis optica spectrum disorder**

In neuromyelitis optica spectrum disorder cases, the inflammation did not present significant differences compared with active MS cases, except for the fact that the border of the neuromyelitis optica spectrum disorder lesions tended to have less CD3 and CD68 infiltration compared with the lesion core, but not significantly so (see table and figure below).

### **Acute disseminated encephalomyelitis**

In the acute disseminated encephalomyelitis cases, the small demyelinating area did not allow to semiquantitative score the inflammatory infiltrate in the plaque area with the same method used for multiple sclerosis and neuromyelitis optica spectrum disorder cases.

**Table.** *The table reports all the data regarding inflammatory infiltrates in demyelinating plaques of multiple sclerosis and neuromyelitis optica spectrum disorder cases; multiple sclerosis lesions are divided according to plaque type (chronic inactive, mixed active-inactive and acute active). Data derived from the anterior optic nerve pathway of non-neurological controls are reported as reference values. CD68 indicate microglial infiltration and has been measured using an automated positive pixel count protocol (positive pixel per micrometer), also semiquantitative assessment of CD3+ lymphocytes and CD68+ microglia in the parenchyma (ranging 0 to 3) and in the perivascular space (ranging 0 to 4) has been scored.*

|                                           | Plaque type | Area | Mean      | Std. Error | 95% Wald Confidence Interval     |           |
|-------------------------------------------|-------------|------|-----------|------------|----------------------------------|-----------|
|                                           |             |      |           |            | Lower                            | Upper     |
|                                           |             |      |           |            | <b>CD68 positive pixel count</b> |           |
| Controls                                  | NAWM        |      | 156,39    | 27,08      | 103,31                           | 209,46    |
|                                           | Plaque      |      | 201,71    | 73,27      | 58,11                            | 345,32    |
| MS - inactive                             | Peri-plaque |      | 171,11    | 59,62      | 54,27                            | 287,96    |
|                                           | NAWM        |      | 169,46    | 51,32      | 68,88                            | 270,05    |
| MS - mixed active                         | Plaque      |      | 726,70    | 143,42     | 445,60                           | 1.007,81  |
|                                           | Peri-plaque |      | 4.411,32  | 1.234,63   | 1.991,48                         | 6.831,15  |
| MS - active                               | NAWM        |      | 3.710,51  | 1.136,42   | 1.483,17                         | 5.937,84  |
|                                           | Plaque      |      | 18.261,95 | 8.975,27   | 670,74                           | 35.853,15 |
|                                           | Peri-plaque |      | 12.556,04 | 3.417,09   | 5.858,68                         | 19.253,40 |
| NMOSD                                     | NAWM        |      | 8.779,00  | 0,00       | 8.779,00                         | 8.779,00  |
|                                           | Plaque      |      | 29.059,39 | 9.707,81   | 10.032,42                        | 48.086,35 |
|                                           | Peri-plaque |      | 1.843,50  | 0,00       | 1.843,50                         | 1.843,50  |
| <b>CD68 semiquantitative - parenchyma</b> |             |      |           |            |                                  |           |
| Controls                                  | NAWM        |      | 0,00      | 0,00       | 0,00                             | 0,00      |
|                                           | Plaque      |      | 0,13      | 0,05       | 0,05                             | 0,22      |
| MS - inactive                             | Peri-plaque |      | 0,22      | 0,08       | 0,07                             | 0,37      |
|                                           | NAWM        |      | 0,32      | 0,16       | 0,00                             | 0,64      |
| MS - mixed active                         | Plaque      |      | 0,62      | 0,12       | 0,39                             | 0,86      |
|                                           | Peri-plaque |      | 1,81      | 0,11       | 1,59                             | 2,03      |
| MS - active                               | NAWM        |      | 1,45      | 0,21       | 1,04                             | 1,85      |
|                                           | Plaque      |      | 2,17      | 0,24       | 1,70                             | 2,64      |
|                                           | Peri-plaque |      | 2,66      | 0,20       | 2,26                             | 3,06      |
| NMOSD                                     | NAWM        |      | 2,13      | 0,00       | 2,13                             | 2,13      |
|                                           | Plaque      |      | 1,63      | 0,26       | 1,13                             | 2,13      |
|                                           | Peri-plaque |      | 1,00      | 0,00       | 1,00                             | 1,00      |
| <b>CD68 semiquantitative - vessels</b>    |             |      |           |            |                                  |           |
| Controls                                  | NAWM        |      | 0,01      | 0,01       | -0,01                            | 0,02      |
|                                           | Plaque      |      | 0,32      | 0,11       | 0,10                             | 0,54      |
| MS - inactive                             | Peri-plaque |      | 0,25      | 0,08       | 0,09                             | 0,42      |
|                                           | NAWM        |      | 0,33      | 0,09       | 0,15                             | 0,50      |
| MS - mixed active                         | Plaque      |      | 0,90      | 0,17       | 0,57                             | 1,23      |
|                                           | Peri-plaque |      | 1,66      | 0,09       | 1,48                             | 1,84      |
| MS - active                               | NAWM        |      | 1,25      | 0,20       | 0,85                             | 1,64      |
|                                           | Plaque      |      | 2,35      | 0,27       | 1,81                             | 2,89      |
|                                           | Peri-plaque |      | 2,42      | 0,21       | 2,01                             | 2,83      |
| NMOSD                                     | NAWM        |      | 2,38      | 0,00       | 2,38                             | 2,38      |
|                                           | Plaque      |      | 2,31      | 0,36       | 1,61                             | 3,01      |
|                                           | Peri-plaque |      | 1,50      | 0,00       | 1,50                             | 1,50      |

|                                       | Plaque type | Area | Mean | Std. Error | 95% Wald Confidence Interval             |       |
|---------------------------------------|-------------|------|------|------------|------------------------------------------|-------|
|                                       |             |      |      |            | Lower                                    | Upper |
|                                       |             |      |      |            | <b>CD3 semiquantitative - parenchyma</b> |       |
| Controls                              | NAWM        |      | 0,03 | 0,02       | -0,01                                    | 0,07  |
|                                       | Plaque      |      | 0,59 | 0,21       | 0,17                                     | 1,00  |
| MS - inactive                         | Peri-plaque |      | 0,32 | 0,17       | -0,02                                    | 0,67  |
|                                       | NAWM        |      | 0,05 | 0,04       | -0,03                                    | 0,13  |
| MS - mixed active                     | Plaque      |      | 0,79 | 0,25       | 0,30                                     | 1,29  |
|                                       | Peri-plaque |      | 1,26 | 0,32       | 0,64                                     | 1,88  |
|                                       | NAWM        |      | 1,12 | 0,31       | 0,53                                     | 1,72  |
|                                       | Plaque      |      | 2,61 | 0,23       | 2,15                                     | 3,07  |
| MS - active                           | Peri-plaque |      | 2,48 | 0,15       | 2,18                                     | 2,78  |
|                                       | NAWM        |      | 1,88 | 0,00       | 1,88                                     | 1,88  |
| NMOSD                                 | Plaque      |      | 2,31 | 0,20       | 1,91                                     | 2,71  |
|                                       | Peri-plaque |      | 3,00 | 0,00       | 3,00                                     | 3,00  |
| <b>CD3 semiquantitative - vessels</b> |             |      |      |            |                                          |       |
| Controls                              | NAWM        |      | 0,30 | 0,12       | 0,07                                     | 0,54  |
|                                       | Plaque      |      | 0,99 | 0,26       | 0,49                                     | 1,50  |
| MS - inactive                         | Peri-plaque |      | 1,15 | 0,25       | 0,67                                     | 1,64  |
|                                       | NAWM        |      | 0,55 | 0,19       | 0,17                                     | 0,92  |
| MS - mixed active                     | Plaque      |      | 1,16 | 0,21       | 0,75                                     | 1,56  |
|                                       | Peri-plaque |      | 1,53 | 0,17       | 1,20                                     | 1,85  |
|                                       | NAWM        |      | 1,39 | 0,27       | 0,87                                     | 1,90  |
|                                       | Plaque      |      | 2,85 | 0,22       | 2,43                                     | 3,27  |
| MS - active                           | Peri-plaque |      | 2,46 | 0,28       | 1,91                                     | 3,01  |
|                                       | NAWM        |      | 2,75 | 0,00       | 2,75                                     | 2,75  |
| NMOSD                                 | Plaque      |      | 2,42 | 0,15       | 2,13                                     | 2,71  |
|                                       | Peri-plaque |      | 2,50 | 0,00       | 2,50                                     | 2,50  |

**Figure.** The boxplots display the features of inflammatory infiltrates in demyelinating plaques of multiple sclerosis lesions by comparing: chronic inactive, mixed active-inactive and acute active plaques. Data derived from the anterior optic nerve pathway of non-neurological controls are also reported as reference values. CD68 indicate microglial infiltration and has been measured using an automated positive pixel count protocol (positive pixel per micrometer), also semiquantitative assessment of CD3+ lymphocytes and CD68+ microglia in the parenchyma (ranging 0 to 3) and in the perivascular space (ranging 0 to 4) has been scored.

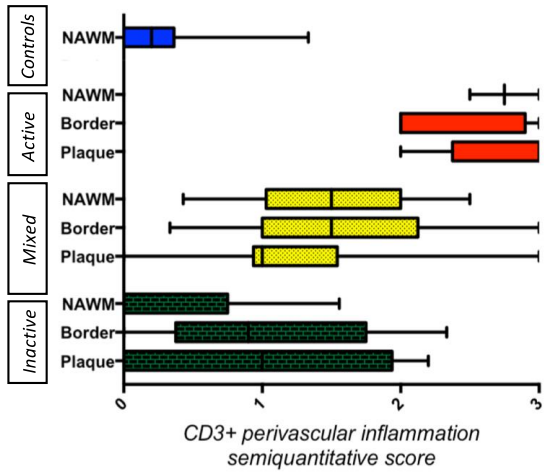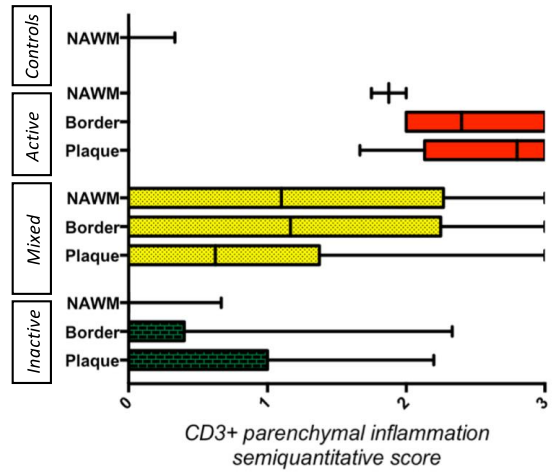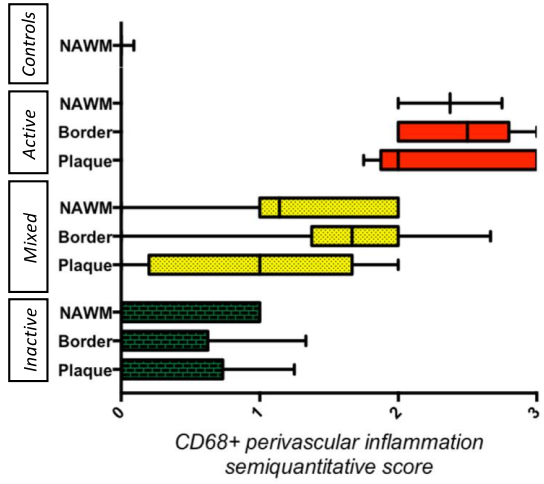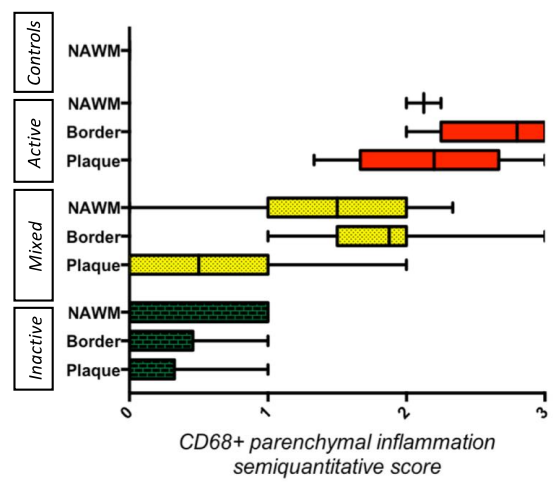

## **Supplementary data, S3. Characteristics of the non-lesional white matter**

### **Multiple sclerosis**

On evaluation of samples without evidence of demyelination (27 samples from 14 cases), diffuse CD68+ microglial/macrophage and CD3+ lymphocyte infiltration was observed in the parenchyma and in the perivascular space. Inflammation in the normal appearing white matter compartment was higher in multiple sclerosis cases compared to controls (*CD68*: perivascular score, Wald 7.87,  $p=0.005$ ; parenchymal score, Wald 7.7,  $p=0.006$ ; pixel count, Wald 4.82,  $p=0.028$ . *CD3*: perivascular score, Wald 12.5,  $p<0.001$ ; parenchymal score, Wald 6.46,  $p=0.011$ ). Sensitivity analysis considering only the multiple sclerosis cases without demyelinating lesions in the whole sampled area (5 donors, 7 samples) yielded similar findings. CD20+ B-cells were not found.

Cases older than 60 years tended to have higher inflammation in the normal appearing white matter compared with cases younger than 60 years (*CD68* pixel count, 469 pixels/nm<sup>2</sup>; CI95% 182 – 758 vs 2956 pixels/nm<sup>2</sup>; CI95% 74 – 5837; Wald 2.83,  $p=0.093$ . *CD3* perivascular score, 0.61; CI95% 0.22 – 1 vs 1.17; CI95% 0.92 – 1.42; Wald 5.5,  $p=0.019$ ). Cases with disease duration longer than 20 years tended to show higher inflammation in the normal appearing white matter compared with cases with shorter duration disease (*CD68* perivascular score, 0.489; CI95% 0.116 – 1.094 vs 1.765; CI95% 0.605 – 2.924; Wald 3.66,  $p=0.056$ ).

### **Neuromyelitis optica spectrum disorder**

On considering the neuromyelitis optica spectrum disorder cases without evidence of demyelination (4 cases, 18 samples), microglial/macrophage and T-cell inflammatory scores were higher than controls (*CD68*: perivascular score, Wald 12.17,  $p<0.001$ ; parenchymal score, Wald 8.18,  $p=0.004$ ; pixel count, Wald 4.54,  $p=0.033$ . *CD3*: perivascular score, Wald 8.33,  $p=0.004$ ; parenchymal score, Wald 3.81,  $p=0.051$ ). CD20+ B-cell lymphocytes were detected in the 33.3% of the samples (6/18 samples; 2/4 cases) (*CD20*: neuromyelitis optica spectrum disorder versus control: Chi-square 9.931,  $p=0.0016$ ). Of note, none of the four neuromyelitis spectrum disorder cases without demyelination included in this analysis had a history of optic neuritis.

### **Acute disseminated encephalomyelitis**

Normal appearing white matter (5 subjects, 10 samples) showed a predominant T-cell lymphocyte infiltration above that of controls (*CD3*: perivascular score, Wald 7.81,  $p=0.005$ ; parenchymal score, Wald 4.56,  $p=0.033$ ). However, the extent CD68+ microglial/macrophage infiltration in the

parenchyma or perivascular space did not differ from controls ( $p>0.1$  in all the analyses). CD20+ B-cells were not found.

### **Comparisons between CNS demyelinating diseases**

CD20+ B-cell lymphocytes were higher in neuromyelitis optica spectrum disorder cases compared to multiple sclerosis and acute disseminated encephalomyelitis cases (Chi-square 14,  $p=0.001$ ). Acute disseminated encephalomyelitis cases demonstrated more extensive CD3+ lymphocyte perivascular infiltration than that observed in multiple sclerosis and neuromyelitis optica spectrum disorder cases (despite statistical significance was not reached in these analyses). CD68 inflammation tended to be lower in acute disseminated encephalomyelitis compared with multiple sclerosis (pixel count, Wald 3.7,  $p=0.055$ ; parenchymal score, Wald 3.38,  $p=0.066$ ) and neuromyelitis optica spectrum disorder cases (pixel count, Wald 3.55,  $p=0.059$ ; parenchymal score, Wald 5.25,  $p=0.022$ ).

**Table.** *The table reports all the data regarding inflammatory infiltrates in the non-lesional white matter of 5 controls, 5 ADEM, 14 MS and 4 NMOSD donors. Only samples without demyelination were considered. CD68 indicates microglial infiltration and has been measured using an automated positive pixel count protocol (positive pixel per micrometer). A semiquantitative assessment of CD3+ lymphocytes and CD68+ microglia in the parenchyma and in the perivascular space (ranging 0 to 3) is also reported.*



|                                           | Mean    | Std. Error | 95% Wald Confidence Interval |         |
|-------------------------------------------|---------|------------|------------------------------|---------|
|                                           |         |            | Lower                        | Upper   |
| <b>CD68 positive pixel count</b>          |         |            |                              |         |
| Controls                                  | 156,39  | 27,08      | 103,31                       | 209,46  |
| ADEM                                      | 364,98  | 151,13     | 68,78                        | 661,19  |
| MS                                        | 2034,85 | 855,29     | 358,51                       | 3711,18 |
| NMOSD                                     | 2162,08 | 941,39     | 316,98                       | 4007,17 |
| <b>CD68 semiquantitative - parenchyma</b> |         |            |                              |         |
| Controls                                  | 0,00    | 0,00       | 0,00                         | 0,00    |
| ADEM                                      | 0,19    | 0,13       | -0,06                        | 0,44    |
| MS                                        | 0,72    | 0,26       | 0,21                         | 1,24    |
| NMOSD                                     | 1,18    | 0,41       | 0,37                         | 1,99    |
| <b>CD68 semiquantitative - vessel</b>     |         |            |                              |         |
| Controls                                  | 0,01    | 0,01       | -0,01                        | 0,02    |
| ADEM                                      | 0,65    | 0,41       | -0,15                        | 1,46    |
| MS                                        | 0,77    | 0,27       | 0,24                         | 1,31    |
| NMOSD                                     | 1,06    | 0,30       | 0,47                         | 1,65    |
| <b>CD3 semiquantitative - parenchyma</b>  |         |            |                              |         |
| Controls                                  | 0,03    | 0,02       | -0,01                        | 0,07    |
| ADEM                                      | 1,23    | 0,56       | 0,13                         | 2,33    |
| MS                                        | 0,56    | 0,21       | 0,15                         | 0,97    |
| NMOSD                                     | 0,80    | 0,40       | 0,02                         | 1,58    |
| <b>CD3 semiquantitative - vessel</b>      |         |            |                              |         |
| Controls                                  | 0,30    | 0,12       | 0,07                         | 0,54    |
| ADEM                                      | 1,69    | 0,50       | 0,71                         | 2,68    |
| MS                                        | 0,96    | 0,14       | 0,68                         | 1,24    |
| NMOSD                                     | 1,29    | 0,32       | 0,66                         | 1,93    |

#### **S4. GFAP and AQP4 expression.**

Because of the vascular anatomy, both GFAP and AQP4 featured an intense rosette-like staining in sagittal sections while a linear, stripe-like and dotted staining was found in longitudinal sections.

For this reason, the sagittal sections showed a higher GFAP pixel intensity (0.129 pixels/um<sup>2</sup>; CI95% 0.06 – 0.198) compared with longitudinal sections (0.032 pixels/um<sup>2</sup>; CI95% 0.023 – 0.04; Wald Chi-square 7.58, p=0.006) in control donors. Similarly AQP4 positive pixels were higher in sagittal (0.23 pixels/um<sup>2</sup>; CI95% 0.14 – 0.32) compared with longitudinal (0.073 pixels/um<sup>2</sup>; CI95% 0.047 – 0.099; Wald Chi-square 13.78, p<0.001) sections. Similar findings were confirmed in donors with demyelinating CNS diseases.
